# Supplementary material for: Efficient electrocatalytic acetylene semihydrogenation by electron–rich metal sites in N–heterocyclic carbene metal complexes
Source: PubMed Central journal article supplement (PMC8589958; doi:10.1038/s41467-021-26853-0), 2021-11-12
Supplement: 41467_2021_26853_MOESM3_ESM.pdf [file 41467_2021_26853_MOESM3_ESM.pdf]

## **Description of Additional Supplementary Files**

File Name: Supplementary Data 1

Description: The results of the DFT simulations for determining the structures of the catalysts
